# Supplementary material for: Effect of Adjuvant Chemotherapy on Stage II Colon Cancer: Analysis of Korean National Data
Source: PubMed Central journal article supplement — Cancer Res Treat. 2017 Dec 7;50(4):1149–63. doi: 10.4143/crt.2017.194 (PMC6192938; doi:10.4143/crt.2017.194), 2017-12-07
Supplement: crt-2017-194-suppl1.pdf [file crt-2017-194-suppl1.pdf]

**S1 Table.** Factors affecting survival outcome for each risk groups in univariate analysis

|                                    | Low-risk group (n=5,684) |                  |                   |         | High-Risk group (n=2,196) |                  |                   |         |
|------------------------------------|--------------------------|------------------|-------------------|---------|---------------------------|------------------|-------------------|---------|
|                                    | Alive<br>(n=5,198)       | Death<br>(n=486) | HR (95% CI)       | p-value | Alive<br>(n=1,816)        | Death<br>(n=380) | HR (95% CI)       | p-value |
| Adjuvant chemotherapy              |                          |                  |                   |         |                           |                  |                   |         |
| Without AC                         | 2,616 (89.4)             | 310 (10.6)       | Reference         |         | 618 (71.6)                | 245 (28.4)       | Reference         |         |
| With AC                            | 2,582 (93.6)             | 176 (6.4)        | 0.56 (0.47-0.68)  | < 0.001 | 1,198 (89.9)              | 135 (10.1)       | 0.32 (0.26-0.40)  | < 0.001 |
| No. of risks                       |                          |                  |                   |         |                           |                  |                   |         |
| 0                                  | 5,198 (91.4)             | 486 (8.6)        |                   |         | -                         | -                | -                 | -       |
| 1                                  |                          |                  |                   |         | 1,600 (84.2)              | 300 (15.8)       | Reference         |         |
| 2                                  |                          |                  |                   |         | 206 (73.6)                | 74 (26.4)        | 1.76 (1.37-2.27)  | < 0.001 |
| 3 or 4                             |                          |                  |                   |         | 10 (62.5)                 | 6 (37.5)         | 2.54 (1.13-5.69)  | 0.024   |
| Sex                                |                          |                  |                   |         |                           |                  |                   |         |
| Male                               | 3,036 (90.4)             | 321 (9.6)        | Reference         |         | 1,060 (82.3)              | 228 (17.7)       | Reference         |         |
| Female                             | 2,162 (92.9)             | 165 (7.1)        | 0.74 (0.61-0.89)  | 0.002   | 756 (83.3)                | 152 (16.7)       | 0.92 (0.75-1.13)  | 0.413   |
| Age (yr)                           |                          |                  |                   |         |                           |                  |                   |         |
| ≤ 45                               | 272 (97.8)               | 6 (2.2)          | Reference         |         | 89 (95.7)                 | 4 (4.3)          | Reference         |         |
| > 45 and ≤ 70                      | 2,911 (95.7)             | 132 (4.3)        | 2.08 (0.92-4.71)  | 0.080   | 962 (91.4)                | 90 (8.6)         | 1.98 (0.73-5.40)  | 0.180   |
| > 70                               | 2,015 (85.3)             | 348 (14.7)       | 7.84 (3.50-17.57) | < 0.001 | 765 (72.8)                | 286 (27.2)       | 7.36 (2.74-19.73) | < 0.001 |
| BMI (kg/m <sup>2</sup> ) (n=7,823) |                          |                  |                   |         |                           |                  |                   |         |
| ≤ 18                               | 226 (82.8)               | 47 (17.2)        | 2.26 (1.52-2.79)  | < 0.001 | 91 (67.4)                 | 44 (32.6)        | 2.33 (1.69-3.21)  | < 0.001 |
| > 18 and ≤ 25                      | 3,382 (90.5)             | 353 (9.5)        | Reference         |         | 1,232 (83.1)              | 250 (16.9)       | Reference         |         |
| > 25                               | 1,565 (95.2)             | 79 (4.8)         | 0.49 (0.39-0.63)  | < 0.001 | 478 (86.3)                | 76 (13.7)        | 0.76 (0.59-0.98)  | 0.033   |
| Type of institution                |                          |                  |                   |         |                           |                  |                   |         |
| Tertiary hospital                  | 2,851 (92.2)             | 242 (7.8)        | Reference         |         | 816 (83.4)                | 163 (16.7)       | Reference         |         |
| General hospital                   | 2,034 (90.0)             | 227 (10.0)       | 1.33(1.11-1.60)   | 0.002   | 941 (82.0)                | 206 (18.0)       | 1.17(0.95-1.44)   | 0.135   |
| Hospital or clinic                 | 313 (94.8)               | 17 (5.2)         | 0.65(0.40-1.06)   | 0.083   | 59 (84.3)                 | 11 (15.7)        | 1.06(0.58-1.96)   | 0.846   |
| ASA                                |                          |                  |                   |         |                           |                  |                   |         |
| I-II                               | 4,446 (93.4)             | 312 (6.6)        | Reference         |         | 1,479 (86.8)              | 224 (13.2)       | Reference         |         |
| III                                | 732 (81.6)               | 165 (18.4)       | 3.18 (2.63-3.84)  | < 0.001 | 313 (68.9)                | 141 (31.1)       | 2.81 (2.27-3.47)  | < 0.001 |

|                                                  |              |            |                   |         |              |            |                  |         |
|--------------------------------------------------|--------------|------------|-------------------|---------|--------------|------------|------------------|---------|
| IV                                               | 20 (69.0)    | 9 (31.0)   | 6.04 (3.12-11.72) | < 0.001 | 24 (61.5)    | 15 (38.5)  | 3.74 (2.22-6.32) | < 0.001 |
| Emergency operation                              |              |            |                   |         |              |            |                  |         |
| No                                               | 5162 (91.5)  | 478 (8.5)  | Reference         |         | 1,399 (86.1) | 225 (13.9) | Reference        |         |
| Yes                                              | 36 (81.8)    | 8 (18.2)   | 1.85 (0.92-3.72)  | 0.085   | 417 (72.9)   | 155 (27.1) | 2.46 (2.00-3.02) | < 0.001 |
| Others                                           | 36 (81.8)    | 8 (18.2)   | -                 | -       | 27 (77.1)    | 8 (22.9)   | Reference        |         |
| Perforated<br>/Obstructive                       | -            | -          |                   |         | 390 (72.6)   | 147 (27.4) | 1.77 (0.86-3.63) | 0.118   |
| Proximal or distal resection margin<br>(n=6,470) |              |            |                   |         |              |            |                  |         |
| Negative                                         | 4,622 (91.8) | 415 (8.2)  |                   |         | 1,122 (82.4) | 239 (17.6) | Reference        |         |
| Positive                                         | -            | -          | -                 | -       | 63 (87.5)    | 9 (12.5)   | 0.64 (0.33-1.24) | 0.185   |
| LVP invasion (n=1,369)                           |              |            |                   |         |              |            |                  |         |
| No                                               | 558 (89.3)   | 67 (10.7)  | -                 | -       | 93 (81.6)    | 21 (18.4)  | Reference        |         |
| Yes                                              | -            | -          |                   |         | 525 (83.3)   | 105 (16.7) | 0.87 (0.55-1.40) | 0.570   |
| Lymph node (n=7,494)                             |              |            |                   |         |              |            |                  |         |
| < 12                                             | -            | -          | -                 | -       | 425 (83.2)   | 86 (16.8)  | Reference        |         |
| ≥ 12                                             | 5,082 (91.5) | 473 (8.5)  |                   |         | 1,199 (84.0) | 229 (16.0) | 1.06 (0.82-1.35) | 0.665   |
| Differentiation (n=3,488)                        |              |            |                   |         |              |            |                  |         |
| Well                                             | 346 (89.9)   | 39 (10.1)  | Reference         |         | 145 (77.5)   | 42 (22.5)  | Reference        |         |
| Moderate                                         | 1,753 (89.3) | 209 (10.7) | 1.05 (0.75-1.48)  | 0.769   | 650 (81.5)   | 148 (18.6) | 0.79 (0.56-1.12) | 0.182   |
| Poorly+others                                    | -            | -          |                   |         | 126 (80.8)   | 30 (19.2)  | 0.86 (0.54-1.37) | 0.519   |
| Stage (n=4,392)                                  |              |            |                   |         |              |            |                  |         |
| IIA                                              | 3,099 (92.9) | 238 (7.1)  |                   |         | 381 (84.3)   | 71 (15.7)  | Reference        |         |
| IIB-IIC                                          | -            | -          |                   |         | 514 (85.2)   | 89 (14.8)  | 0.95 (0.70-1.30) | 0.745   |

HR, hazard ratio; CI, confidence interval; AC, adjuvant chemotherapy; BMI, body mass index; ASA, American Society of Anesthesiologists; LVP, lymphovascular or peri-neural.
