# Supplementary material for: Effect of Adjuvant Chemotherapy on Stage II Colon Cancer: Analysis of Korean National Data
Source: PubMed Central journal article supplement — Cancer Res Treat. 2017 Dec 7;50(4):1149–63. doi: 10.4143/crt.2017.194 (PMC6192938; doi:10.4143/crt.2017.194), 2017-12-07
Supplement: crt-2017-194-suppl2.pdf [file crt-2017-194-suppl2.pdf]

**S2 Table.** Effect of adjuvant chemotherapy according to evaluating year and risk group status

|                       | Low-risk group   |         |                      |         | High-risk group  |         |                      |         |
|-----------------------|------------------|---------|----------------------|---------|------------------|---------|----------------------|---------|
|                       | HR (95% CI)      | p-value | Adjusted HR (95% CI) | p-value | HR (95% CI)      | p-value | Adjusted HR (95% CI) | p-value |
| <b>2011-2014</b>      |                  |         |                      |         |                  |         |                      |         |
| Adjuvant chemotherapy |                  |         |                      |         |                  |         |                      |         |
| Without AC            | Reference        |         | Reference            |         | Reference        |         | Reference            |         |
| With AC               | 0.56 (0.47-0.68) | < 0.001 | 0.74 (0.61-0.89)     | 0.002   | 0.32 (0.26-0.40) | < 0.001 | 0.46 (0.37-0.58)     | < 0.001 |
| <b>2011</b>           |                  |         |                      |         |                  |         |                      |         |
| Adjuvant chemotherapy |                  |         |                      |         |                  |         |                      |         |
| Without AC            | Reference        |         | reference            |         | Reference        |         | Reference            |         |
| With AC               | 0.63 (0.38-1.03) | 0.067   | 0.88 (0.51-1.50)     | 0.627   | 0.41 (0.29-0.58) | < 0.001 | 0.52 (0.36-0.77)     | 0.001   |
| <b>2012</b>           |                  |         |                      |         |                  |         |                      |         |
| Adjuvant chemotherapy |                  |         |                      |         |                  |         |                      |         |
| Without AC            | Reference        |         | Reference            |         | Reference        |         | Reference            |         |
| With AC               | 0.57 (0.43-0.77) | < 0.001 | 0.71 (0.52-0.96)     | 0.028   | 0.31 (0.20-0.48) | < 0.001 | 0.43 (0.27-0.68)     | < 0.001 |
| <b>2013-2014</b>      |                  |         |                      |         |                  |         |                      |         |
| Adjuvant chemotherapy |                  |         |                      |         |                  |         |                      |         |
| Without AC            | Reference        |         | Reference            |         | Reference        |         | Reference            |         |
| With AC               | 0.54 (0.41-0.70) | < 0.001 | 0.75 (0.56-0.99)     | 0.041   | 0.25 (0.18-0.35) | < 0.001 | 0.38 (0.26-0.54)     | < 0.001 |

The HR for the low-risk group was adjusted for year (for 2011-2014), sex, age, BMI, type of institutions, ASA, and emergency operation. The HR for the high-risk group was adjusted for year (for 2011-2014), number of risk, sex, age, BMI, type of institutions, ASA, and emergency operation. HR, hazard ratio; CI, confidence interval; AC, adjuvant chemotherapy; BMI, body mass index; ASA, American Society of Anesthesiologists.
